# Supplementary material
Source: Springer Nature journal article supplement (https://www.springermedizin.de/resource/supplementary/12879_2011_1711_MOESM2_ESM.pdf/9443776)

### Vaginal pH by Age at Visit

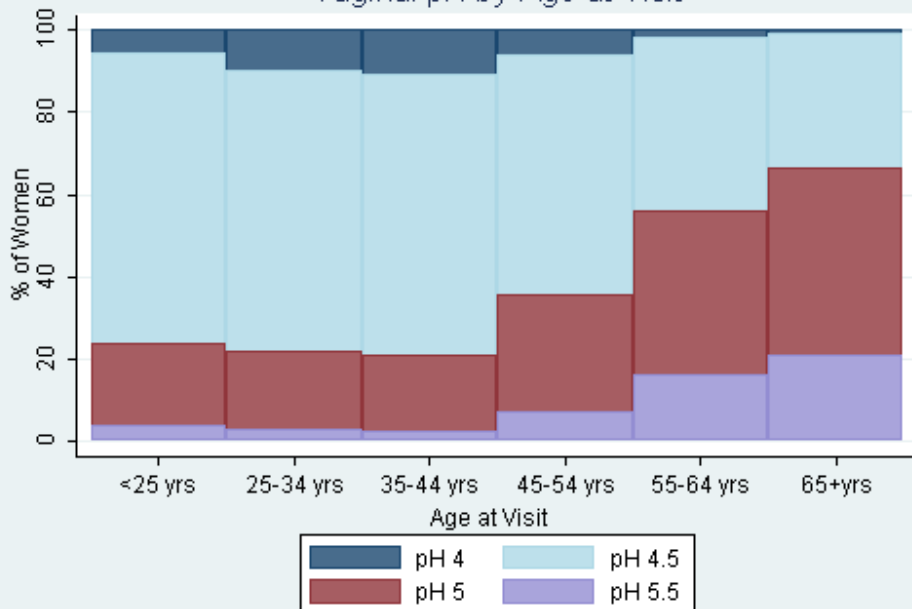

Supplement: MOESM2 [file 9443776]
